# Supplementary material
Source: PubMed Central journal article supplement (PMC5095383)
Supplement: rspb20161760supp1.pdf [file rspb20161760supp1.pdf]

**Supplementary material for ‘The influence of weather conditions during  
gestation on life histories in a wild Arctic ungulate’**

Mathieu Douhard<sup>1,2</sup>, Leif Egil Loe<sup>2</sup>, Audun Stien<sup>3</sup>, Christophe Bonenfant<sup>1</sup>, R. Justin Irvine<sup>4</sup>,  
Vebjørn Veiberg<sup>5</sup>, Erik Ropstad<sup>6</sup>, Steve Albon<sup>4</sup>

<sup>1</sup>Université de Lyon, 69000, Lyon; Université Lyon 1; CNRS, UMR 5558, Laboratoire de  
Biométrie et Biologie Evolutive, 69622 Villeurbanne, France.

<sup>2</sup>Norwegian University of Life Sciences, Department of Ecology and Natural Resource  
Management, 1432 Aas, Norway.

<sup>3</sup>Norwegian Institute for Nature Research, Department for Arctic Ecology, Fram Centre, 9296  
Tromsø, Norway.

<sup>4</sup>The James Hutton Institute, Aberdeen AB15 8QH, UK.

<sup>5</sup>Norwegian Institute for Nature Research, Department for Terrestrial Ecology, 7485  
Trondheim, Norway.

<sup>6</sup>Norwegian University of Life Sciences, Department of Production Animal Clinical Sciences,  
0033 Oslo, Norway.

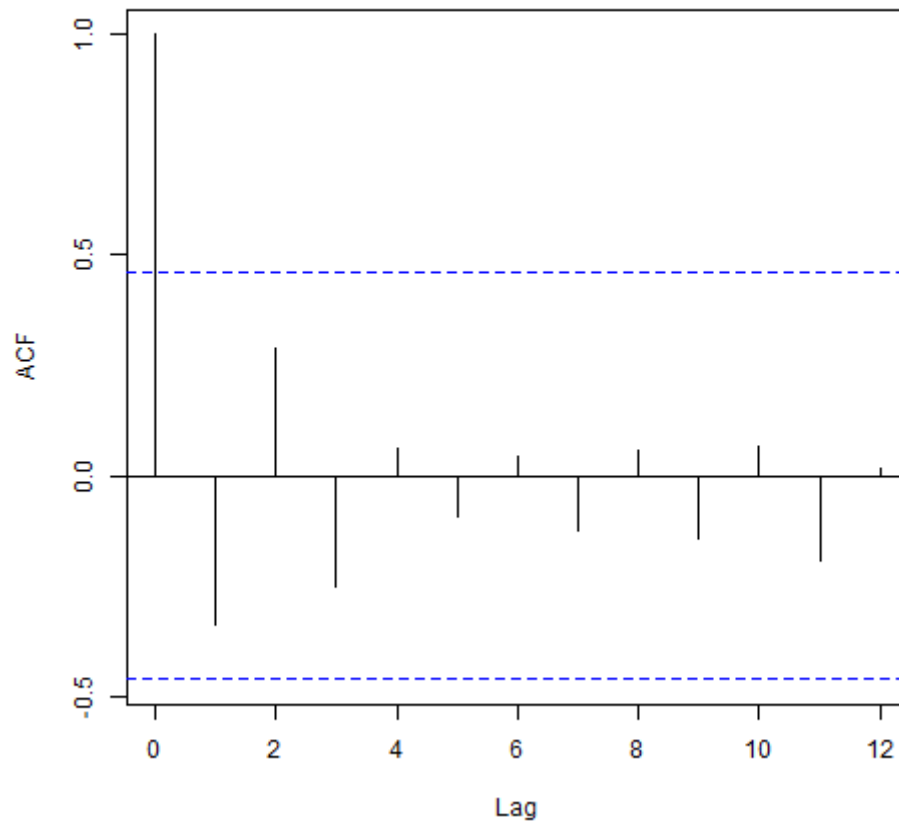

Figure S1. Estimates of the temporal autocorrelation for rain-on-snow events. Temporal autocorrelation function (ACF) include confidence intervals (dashed blue lines) based on uncorrelated series.

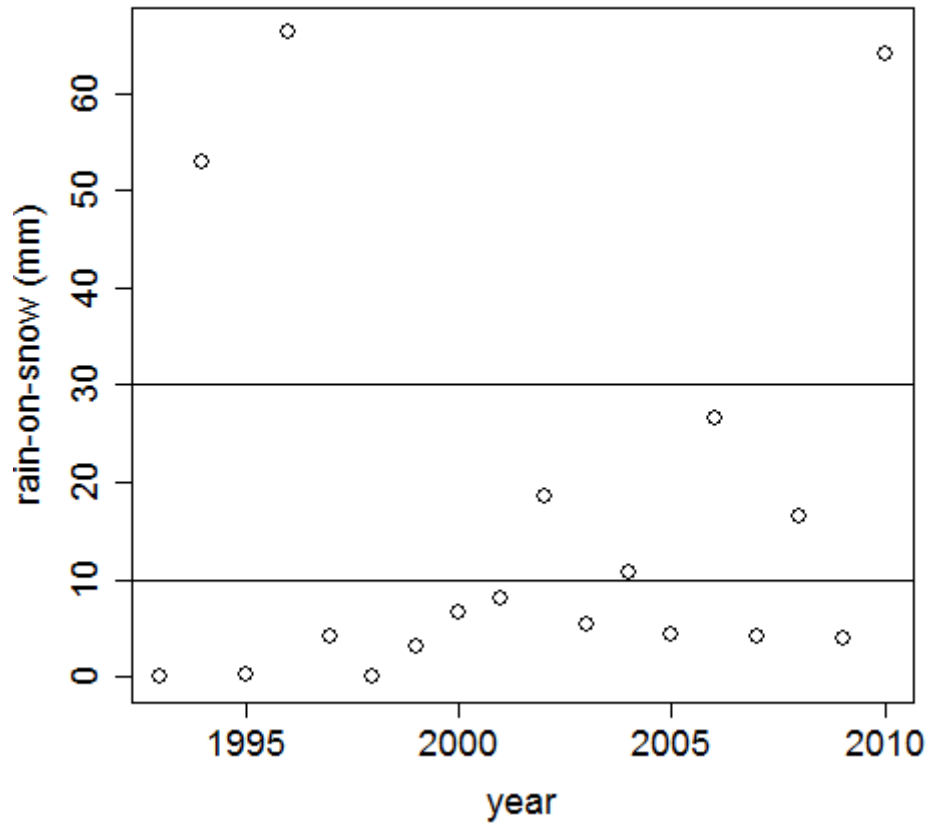

Figure S2. Temporal variation in rain-on-snow (ROS). Based on this graph, three distinct groupings emerged:  $ROS \leq 10$  mm (low values),  $10 \text{ mm} < ROS \leq 30$  mm (medium values),  $ROS > 30$  mm (high values). Sample sizes for high and medium categories are, however, small so that we combined these two categories into a new category named ‘high  $ROS_{utero}$ ’ in the main manuscript.

$$\begin{pmatrix}
 0 & f_2 & f_3 & f_4 & f_5 & f_6 & f_7 & f_8 & f_9 & f_{10} & f_{11} & f_{12} \\
 s_1 & & & & & & & & & & & \\
 & s_2 & & & & & & & & & & \\
 & & s_3 & & & & & & & & & \\
 & & & s_4 & & & & & & & & \\
 & & & & s_5 & & & & & & & \\
 & & & & & s_6 & & & & & & \\
 & & & & & & s_7 & & & & & \\
 & & & & & & & s_8 & & & & \\
 & & & & & & & & s_9 & & & \\
 & & & & & & & & & s_{10} & & \\
 & & & & & & & & & & s_{11} & s_{12}
 \end{pmatrix}$$

Figure S3. Population projection matrix used for female Svalbard reindeer. *f* and *s* values correspond respectively to age-specific recruitment and survival (*f*<sub>2</sub> = recruitment for females aged 2, *s*<sub>1</sub> = survival between 1 and 2 years, etc...). All females ≥ 12 years of age were pooled into a single category. Recruitment should be equal to reproductive success estimated in summer × winter survival of calves × 0.5 (sex ratio). However, because information on calf winter survival is not available, we estimated recruitment as reproductive success in summer × 0.5.

Table S1. Generalized linear mixed model of the probability of reproductive success for female Svalbard reindeer aged 7 years and over. Early reproduction corresponds to the proportion of years in which a female produced a calf between age at first reproduction and 6 years old. All continuous variables were centered and divided by 2 s.d.

|                                  | <b>Estimate</b> | <b>s.e.</b> | <b>p-value</b> |
|----------------------------------|-----------------|-------------|----------------|
| intercept†                       | -0.263          | 0.343       | 0.44           |
| age at last observation          | -0.242          | 0.318       | 0.44           |
| log (ROS <sub>current</sub> + 1) | -1.189          | 0.553       | 0.03           |
| Age                              | -0.657          | 0.321       | 0.04           |
| early reproduction               | 0.662           | 0.248       | 0.007          |
| ROS <sub>utero</sub>             | 0.626           | 0.286       | 0.02           |

†Females born under high ROS<sub>utero</sub> were considered as reference.

Table S2. Generalized linear mixed model of the probability of reproductive success based on 746 observations of 287 female Svalbard reindeer aged between 2 and 6 years. All continuous variables were centered and divided by 2 s.d.

|                                  | <b>Estimate</b> | <b>s.e.</b> | <b>p-value</b> |
|----------------------------------|-----------------|-------------|----------------|
| intercept†                       | 0.300           | 0.258       | 0.24           |
| age at last observation          | -0.309          | 0.230       | 0.18           |
| log (ROS <sub>current</sub> + 1) | -1.393          | 0.385       | < 0.001        |
| Age                              | 2.205           | 0.245       | < 0.001        |
| age <sup>2</sup>                 | -2.567          | 0.457       | < 0.001        |
| ROS <sub>utero</sub>             | 0.082           | 0.201       | 0.68           |

†Females born under high ROS<sub>utero</sub> were considered as reference.

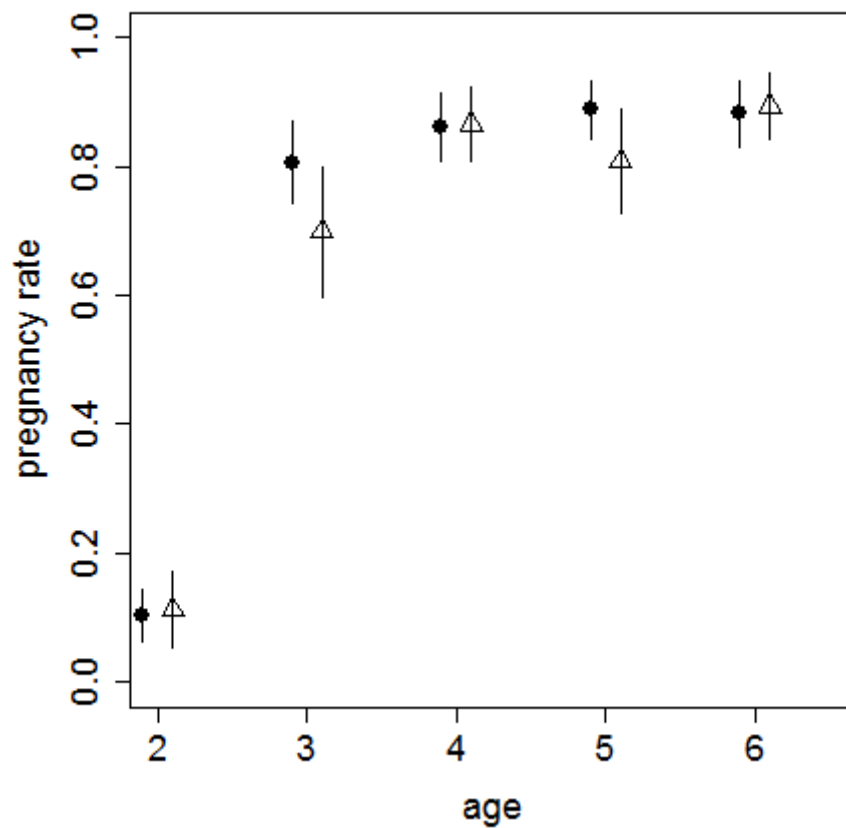

Figure S4. Relationship between pregnancy rate ( $\pm$  s.e.) and age for female reindeer aged 2-6 years that experienced high (open triangles) or low (filled circles) rain on snow in utero. Observations are generated from a generalized linear mixed model with female identity and year as random factors.
